1 **The mechanical and morphological properties of**  
2 **systemic and pulmonary arteries differ in the**  
3 **earth boa, a snake without ventricular pressure**  
4 **separation**

5  
6 Benjamin J. van Soldt<sup>1,§</sup>, Tobias Wang<sup>2</sup>, Renato Filogonio<sup>3</sup> and Carl Christian  
7 Danielsen<sup>4</sup>

8  
9 <sup>1</sup> Gladstone Institute of Cardiovascular Disease, J. David Gladstone Institutes,  
10 1650 Owens St, San Francisco, CA, 94158, United States of America

11 <sup>2</sup> Aarhus Institute of Advanced Sciences (AIAS), Aarhus University, 8000  
12 Aarhus C, Denmark

13 <sup>3</sup> Department of Physiological Sciences, Federal University of São Carlos, São  
14 Carlos, SP 13565-905, Brazil

15 <sup>4</sup> Department of Biomedicine, University of Aarhus, Wilhelm Meyers Allé 3,  
16 8000 Aarhus C, Denmark

17 <sup>§</sup> Corresponding author

18  
19 BJS: [benjamin.vansoldt@gladstone.ucsf.edu](mailto:benjamin.vansoldt@gladstone.ucsf.edu)

20  
21 Running title: Mechanical properties of earth boa great arteries

22  
23 Keywords: snake, vessel wall, blood pressure, tension, biomechanics

24

25 **List of Symbols and Abbreviations**

- 26 Ad, tunica adventitia
- 27  $d_h$ , hook diameter
- 28 DAo, dorsal aorta
- 29 DLAo, distal section of the left aorta
- 30 DRAo, distal section of the right aorta
- 31  $l_{h0}$ , linear distance between hooks
- 32 LPA, left pulmonary artery
- 33 MAP, mean arterial blood pressure
- 34 Me, tunica media
- 35 PLAo, proximal section of the left aorta
- 36 PRAo, proximal section of the right aorta
- 37 RPA, right pulmonary artery
- 38 SEM, standard error of the mean
- 39 UC, unit collagen
- 40  $x$ , hook travel distance at point of vessel rupture

41 **Abstract**

42 The walls of the mammalian aorta and pulmonary artery are characterized by  
43 diverging morphologies and mechanical properties, which has been correlated  
44 with high systemic and low pulmonary blood pressures, as a result of  
45 intraventricular pressure separation in the mammalian ventricle. However, the  
46 relation between intraventricular pressure separation and diverging aortic and  
47 pulmonary artery wall morphologies and mechanical characteristics is not  
48 understood. The snake cardiovascular system poses a unique model for the  
49 study of this question, since representatives both with and without  
50 intraventricular pressure separation exist. In this study we perform uniaxial  
51 tensile testing on vessel samples taken from the aortas and pulmonary arteries  
52 of the earth boa, *Acrantophis madagascariensis*, a species without  
53 intraventricular pressure separation. We then compare these morphological and  
54 mechanical characteristics with samples from the ball python, *Python regius*,  
55 and the yellow anaconda, *Eunectes notaeus*, species with and without  
56 intraventricular pressure separation, respectively. Strikingly, we find that  
57 although the aortas and pulmonary arteries of *A. madagascariensis* respond  
58 similarly to the same intramural blood pressures, they diverge strongly in  
59 morphology, and that this is a common attribute among species without  
60 intraventricular pressure separation in this study. In contrast, *P. regius* aortas  
61 and pulmonary arteries diverge both morphologically and in terms of their  
62 mechanical properties. Altogether our data indicate that intraventricular  
63 pressure separation does not explain diverging aortic and pulmonary artery  
64 morphologies. Following the Law of Laplace, we propose that thin pulmonary  
65 arteries represent a mechanism to protect the fragile pulmonary vascular bed by  
66 reducing the blood volume that passes through, to which genetic factors may  
67 contribute more strongly than physiological parameters.

68

## 69 **Introduction**

70 Strong yet distensible arterial walls are critical for proper function of the vascular  
71 tree in animals. Strength is required to withstand high pressures when blood is  
72 ejected from the heart during systole, and distensibility is critical to ensure that  
73 the major arteries provide capacitance and pulse-pressure-smoothing after  
74 each cardiac contraction (Shadwick, 1999). These mechanical properties derive  
75 from morphological features of the vessel walls, primarily thickness, elastin and  
76 collagen content, and the extent and mode of cross-linking and alignment of the  
77 elastin and collagen fibers (Dobrin, 1978; Wagenseil et al., 2009). These  
78 properties are established during embryological development in response to  
79 hemodynamic forces, such as wall shear stress, that continuously drive  
80 vascular remodeling (Jones et al., 2006; Reneman et al., 2006). In mammals,  
81 abrupt hemodynamic changes occur after birth, when the pulmonary and  
82 systemic circuits become fully separated (Langille, 1996). Intriguingly, reports in  
83 various mammals suggest that after birth major structural changes occur in the  
84 aorta wall as compared to the pulmonary artery, the former becoming  
85 increasingly thicker-walled and stronger than the latter (Gerrity and Cliff, 1975;  
86 Leung et al., 1977). These changes probably reflect necessary adaptations to  
87 the considerably higher systemic blood pressure as compared to the pulmonary  
88 arterial pressure. However, it remains unclear whether intramural blood  
89 pressure indeed provides the causative link to differences in arterial wall  
90 morphology.

91 Intraventricular pressure separation describes the ability of the heart to  
92 eject blood into the systemic and pulmonary circulations at different pressures.  
93 This ability evolved independently in mammals and archosaurs (birds and  
94 crocodiles) by establishing a full ventricular septum that divides the ventricle  
95 into left (systemic) and right (pulmonary) chambers (Hicks, 1998). In contrast,  
96 with the exception of pythons and *Varanus* lizards, non-archosaur sauropsids  
97 typically lack a complete ventricular septum, resulting in similar systolic  
98 pressures in systemic and pulmonary arteries (Jensen et al., 2014). Reptiles,  
99 therefore, represent an interesting possibility to investigate the relationship  
100 between pressure separation and arterial mechanical characteristics.

101 In previous studies, we analyzed the mechanical characteristics of the  
102 major arteries of ball pythons (*Python regius*), which has functional  
103 intraventricular pressure separation (Jensen et al., 2010a; van Soldt et al.,  
104 2015; Wang et al., 2002; Wang et al., 2003; Zaar et al., 2007), and the yellow  
105 anaconda (*Eunectes notaeus*) that lacks intraventricular pressure separation  
106 (Filogonio et al., 2018). These studies revealed that the aortae and pulmonary  
107 arteries of *P. regius*, as in mammals, differ in their mechanical properties, while  
108 they are more similar in *E. notaeus*. However, the similarity in mechanical  
109 properties was not mirrored in morphological features, as might have been  
110 expected. Thus, it is possible that, while intraventricular pressure separation  
111 has profound effects on morphology of the great arteries, it may not play the  
112 expected causative role.

113 In the present study, we therefore investigate the mechanical properties  
114 of the aortae and pulmonary arteries of the earth boa (*Acrantophis*  
115 *madagascariensis*) and compare to other species to better understand the  
116 relation between intraventricular pressure separation and the mechanical  
117 properties of the great arteries. We first demonstrate that the earth boa lacks  
118 pressure separation and then report our findings on the mechanical  
119 characteristics of the pulmonary artery and aorta walls. As in *E. notaeus*, we  
120 find that the pulmonary arteries are remarkably resilient to high strains, despite  
121 lacking apparent strength, and that this likely relates to their surprisingly small  
122 diameter, which may negate the need for increased wall strength. We conclude  
123 that differences in morphology and mechanical properties between the aorta  
124 and pulmonary arteries may be related to a combination of genetic or  
125 developmental factors in addition to pressure separation.

126

## 127 **Materials and methods**

### 128 **Snake specimens**

129 Nine captive-bred earth boas, *Acrantophis madagascariensis* (Duméril &  
130 Bibron, 1844), with a body mass ranging from 244–655g ( $344 \pm 46$ g, mean  $\pm$   
131 SEM, Table 1) were donated by a zoological garden and kept in accordance  
132 with §53 of Danish experimental animal welfare regulations (permit ID 2013-15-

133 2934-00847). Snakes were fed rodents weekly, but fasted several weeks prior  
134 to euthanasia.

135

### 136 **Blood pressure measurements**

137 Systemic and pulmonary blood pressures were measured in two anesthetized  
138 snakes both by intraventricular and extracardiac cannulation (vertebral and right  
139 pulmonary arteries). Snakes were anesthetized by intramuscular injection of  
140 pentobarbital (30 mg/kg) and anesthesia was confirmed by lack of muscle tone.  
141 After subcutaneous application of Xylocain (20 mg/ml), the cardiac region was  
142 exposed through a 10 cm ventral incision. Right aortic and right pulmonary  
143 arterial pressures were measured by cannulating the vertebral and right  
144 pulmonary artery with PE60 catheters containing heparinized saline (50 IU/ml).  
145 Intraventricular blood pressures were measured in the cavum arteriosum and  
146 cavum pulmonale by creating a small incision in the respective ventricular walls  
147 and inserting PE90 catheters (see Wang et al. (2003) for details on  
148 experimental procedures). To measure systemic blood pressure in four fully  
149 recovered snakes, snakes were anesthetized by inhalation of isoflurane, and  
150 the dorsal aorta was cannulated in the tail with a PE60 catheter. Pressure  
151 measurements were taken 3, 5 and 24 h after recovery from anesthesia.

152 Catheters were connected to Baxter Edward pressure transducers  
153 (model PX600, Irvine, CA, USA) placed at heart level of the snakes, and  
154 acquired using a Biopac MP100 data acquisition system (Goleta, CA, USA).  
155 Afterwards the snakes were euthanatized (30-50 mg/kg pentobarbital) and the  
156 heart, including great arteries, were excised. Aortic and pulmonary artery  
157 segments (~1cm) were collected from seven locations (left and right pulmonary  
158 artery, proximal and distal locations of left and right aorta, and dorsal aorta; see  
159 also Fig. 1 in van Soldt et al. (2015)) and frozen at -20°C until further study.  
160 Freezing has minimal effect on the mechanical properties studied here (Adham  
161 et al., 1996; Chow and Zhang, 2011; Stemper et al., 2007).

162

### 163 **Histology**

164

165 Images of histological sections of vessel segments were obtained from one  
166 snake as previously described (van Soldt et al., 2015). Briefly, the segments  
167 were fixed in formaldehyde, embedded in paraffin and sectioned (4 $\mu$ m). The  
168 sections were stained with resorcin, Sirius red F3B and Mayer's haematoxylin.  
169 Photographs were taken with an Olympus C-7070 WZ camera (Tokyo, Japan)  
170 mounted on a Leica DMRB microscope (Wetzlar, Germany) using both bright  
171 field and circular polarization.

172

### 173 **Tissue preparation for mechanical testing**

174 All procedures were described previously (van Soldt et al., 2015). Briefly, vessel  
175 sections were cut into rings with a nominal length of 1mm and submerged in  
176 50mM Tris/HCl solution (pH 7.4). Cross-sectional area, height and diameter  
177 were measured by mounting the rings on a tapered glass rod at minimal strain  
178 for photography using a Nikon microscope (Tokyo, Japan) with circular  
179 polarization and analyzed using ImageJ v1.47. A scale was photographed for  
180 calibration purposes. The rings were then frozen at -20°C until further use.

181

### 182 **Mechanical testing**

183 All procedures were described by van Soldt et al. (2015). Briefly, after thawing  
184 to room temperature, a vessel ring was placed around two orthogonally bent  
185 hooks with a diameter ( $d_h$ ) of 0.55mm (aortas) or 0.35mm (pulmonary arteries)  
186 and an initial linear distance between the hooks ( $l_{h0}$ ) of 1.2mm and 0.5mm,  
187 respectively. One hook was connected to a load cell while a step motor moved  
188 the other. Travel distance and load cell readings were acquired continuously.  
189 Each ring was subjected to a cycle of five tests with a tension maximum of  
190 0.25N for the left or right aortas, 0.2N for the dorsal aorta, and 0.075N for  
191 pulmonary arteries, because the latter were hypothesized to rupture at lower  
192 loads. Hereafter a tension test to rupture was carried out, with maximum travel  
193 distance set at the point of vessel rupture ( $x$ ). Ruptured rings were collected for  
194 hydroxyproline determination (Danielsen and Andreassen, 1988; Woessner,  
195 1976). Collagen content was calculated as  $7.46 \times$  hydroxyproline content

196 (Neuman and Logan, 1950). Two to four (mean 3.7) ring specimens from each  
197 vessel segment were tested.

198

### 199 **Determination of collagen and elastin content**

200 To determine the elastin and collagen fractions relative to dry weight, vessels  
201 were defatted with acetone and freeze-dried. Elastin content (percentage of dry  
202 weight) was determined after an extraction procedure according to Lansing et  
203 al. (1952). Aliquots of the extracts were used for hydroxyproline determination  
204 (described above).

205

### 206 **Calculation of mechanical properties**

207 Equations have been derived previously (van Soldt et al., 2015). Briefly, we first  
208 derived stress and strain values as follows:

209 (Eqn 1)  $\sigma = \frac{F}{A}$

210 (Eqn 2)  $\varepsilon = \frac{\Delta l}{l_0}$

211 Where  $F$  is load,  $A$  is cross-sectional area,  $\Delta l$  corresponds to incremental vessel  
212 luminal circumference ( $l = 2 \cdot (l_{h0} + x - d_h) + (d_h \cdot \pi)$ ), and  $l_0$  corresponds to  
213 vessel wall unstrained circumference, recorded as the circumference at a load  
214 value of 0.5mN. From this, we derived maximum load ( $F_{\max}$ ) and strain at  
215 maximum load ( $\varepsilon_{\max}$ ), as well as stress-strain and load-strain curves.

216 We calculated elastic modulus  $E$  (Gibbons and Shadwick, 1989), using  
217 the stress and strain, as follows:

218 (Eqn 3)  $E = \frac{\Delta\sigma}{\Delta\varepsilon}$

219 To calculate compliance curves, we first derived relative volume change ( $V/V_0$ )  
220 from strain values. After simplification:

221 (Eqn 4)  $\frac{V}{V_0} = (1 + \varepsilon)^2$

222 Using load ( $F$ ) and corresponding strain ( $\varepsilon$ ) values and the law of Laplace as  
223 applied to a cylinder we calculated pressure change (Herman, 2007), giving us:

224 (Eqn 5)  $P = \frac{F}{r \cdot h}$



225 Herein,  $h$  is the nominal height, and the luminal radius ( $r$ ) is  $r = \frac{l_0(1+\varepsilon)}{2\pi}$  ( $r = \frac{l}{2\pi}$ ,  
226 where  $l = l_0(1 + \varepsilon)$ ), so that:  
227 (Eqn 6)  $P = \frac{F}{r \cdot h} = \frac{2\pi F}{l_0(1+\varepsilon)h}$

228

## 229 **Statistical analysis**

230 Statistical analyses were described previously (van Soldt et al., 2015). Briefly,  
231 we ran all statistical analyses in R 4.0.3 (R Core Team, 2014) running in  
232 RStudio v1.3.1093 (RStudio, 2013), using packages lattice (Sarkar, 2008), lme4  
233 (Bates et al., 2014), car (Fox and Weisberg, 2011) and multcomp (Hothorn et  
234 al., 2008). We used a mixed model (tested variable as dependent variable, e.g.  
235  $F_{\max}$ , and individual animal (Table 1) as a random variable). A post-hoc Tukey  
236 test was used to identify significant differences between vessel segment pairs  
237 ( $p < 0.05$ ). Curves were calculated for each vessel section per snake and then  
238 combined, per vessel section, into mean curves for presentation in this work.  
239 Curve data for proximal and distal segments for both aortas were pooled using  
240 described equations (Baker and Nissim 1963). One-way Anova was used for  
241 statistical tests on comparisons of morphological parameters between snake  
242 species using standard R commands. All data are displayed as mean  $\pm$  SEM.

243

## 244 **Results**

### 245 ***A. madagascariensis* lacks intraventricular pressure separation**

246 We confirmed that *A. madagascariensis* lacks intraventricular pressure  
247 separation by measuring intraventricular and extracardiac (vertebral and right  
248 pulmonary arteries) systemic and pulmonary blood pressures (Figure 1).  
249 Systemic and pulmonary pressure waveforms overlapped entirely for  
250 intraventricular pressure measurements, both during systole and diastole.  
251 Waveforms for extracardiac measurements overlapped during systole (Figure  
252 1A). Indeed, we observed no significant difference between systemic and  
253 pulmonary systolic pressures ( $4.9 \pm 0.6$  and  $4.7 \pm 0.2$  kPa, respectively;  $p=0.697$ ,  
254  $n=2$ ; Figure 1B). To ensure that anesthesia did not have significant effects on  
255 blood pressure, we also measured systemic blood pressure in conscious *A.*

256 *madagascariensis*. Anesthetized ( $4.0 \pm 0.6$  kPa,  $n=2$ ) and conscious ( $4.0 \pm 0.2$   
257 kPa,  $n=4$ ) mean arterial blood pressure (MAP) were not significantly different  
258 ( $p=0.978$ ). Thus, *A. madagascariensis* does not have intraventricular pressure  
259 separation.

260

261 **The aortic walls are wider, thicker, yet more elastic than the pulmonary**  
262 **artery walls**

263 We quantitatively determined vessel dimensions by brightfield microscopy,  
264 combined with biochemical determinations of vessel wall composition. The  
265 aortic vessels were consistently thicker-walled ( $p < 0.001$ ;

266

267 Figure 2A-L, M) and of larger diameter than the pulmonary arteries ( $p < 0.0001$ ;

268

269 Figure 2A-L, N). More specifically, proximal and distal sections of left

270 (PLAo/DLAo) and right aorta (PRAo/DRAo) were not significantly different in

271 either wall thickness ( $p=1$ ;  $p=0.132$ ) or diameter ( $p=1$ ;  $p=0.979$ ). However, the

272 left aorta was thicker walled ( $p=0.0242$ ) and wider ( $p < 0.0001$ ) than the right

273 aorta. The dorsal aorta (DAo) was of larger diameter than either the left or right

274 aorta ( $p < 0.00001$ ). Finally, the right pulmonary artery (RPA) was thicker walled

275 ( $p=0.006$ ) and wider ( $p < 0.00001$ ) than the left pulmonary artery (LPA).

276 In the vessel wall, the elastin-rich tunica media confers elasticity, while  
277 the tunica adventitia—which is comprised predominantly of collagen fibers—  
278 confers strength. Microscopy using a circular polarization filter indicated that the  
279 aortic tunica media (Me;

280

281 Figure 2C, F) was thicker than the tunica adventitia (Ad;

282

283 Figure 2C, F). In contrast, these two layers were roughly equally thick in  
284 the pulmonary artery walls (

285

286 Figure 2I, L), suggesting that the aortic walls are more elastic than those

287 of the pulmonary arteries. Indeed, determination of elastin and collagen

288 percentages (Table 3) showed that aortic sections had consistently higher

289 elastin content (~30%), but lower collagen content (~20%) compared to

290 pulmonary sections (~9% and ~40%, respectively). However, unit collagen (UC;

291 Fig. 2O), which normalizes absolute collagen content (in mg) by vessel

292 circumference (in mm), demonstrated that differences in absolute collagen

293 content between aortic and pulmonary artery sections could be explained by the  
294 smaller size of the pulmonary arteries, and were consistent with identified  
295 differences in wall thickness and diameter (Figs 2M, N). Thus, the left aorta had  
296 higher UC than the right aorta ( $p=0.031$ ), and the right pulmonary artery had  
297 higher UC than the left pulmonary artery ( $p<0.001$ ). Altogether, these data  
298 suggest that the aortic walls are more elastic than the pulmonary artery walls.

299

### 300 **The aortic walls are stronger and more compliant than the pulmonary** 301 **artery walls**

302 We next investigated the mechanical properties of the aorta and pulmonary  
303 artery walls by subjecting vessel sections to 5 cycles of uniaxial mechanical  
304 tension testing, followed by a test to rupture. Loop curves demonstrated that  
305 steady state was reached by the fourth cycle for both aortic and pulmonary  
306 artery vessel segments (

307

308 Figure 3A). Although load limits in cycle tests were set according to the  
309 expected maximal load that the vessel segments could endure without  
310 premature rupture (see methods), calculation of mechanical hysteresis (viscous  
311 damping, loss of elastic energy; loop area divided by area under the loading  
312 curve) showed that the pulmonary artery walls were significantly less elastic  
313 than those of the aorta ( $p<0.0001$ ;

314

315 Figure 3B). Pulmonary arteries also experienced higher load and stress than  
316 aortic segments at low strains, and ruptured at significantly lower load and  
317 stress values, indicating that the pulmonary artery walls are weaker than the  
318 aortic walls ( $p<0.001$ ;

319

320 Figure 3C-E). All aortic segments performed similarly. The left and right  
321 pulmonary artery segments also performed similarly initially, but at higher  
322 strains ( $\epsilon > 0.4$ ) the right pulmonary artery displayed steeper load/strain and  
323 stress/strain relationships than the left pulmonary artery (

324

325 Figure 3D). Because left and right aortic distal and proximal sections did not  
326 differ in their mechanical properties ( $p=0.152$ ,  $p=0.688$ , respectively), we pooled  
327 these sections and treated them as complete left and right aorta hereafter.

328 The load a vessel wall can endure is linked to gross morphological  
329 properties, such as wall thickness and collagen content. We therefore  
330 normalized maximum load values for these two variables to obtain maximum  
331 stress and maximum load/unit collagen, the latter of which may be regarded as  
332 a measure of 'collagen quality' (

333

334 Figure 4). In both cases, significant relationships between pulmonary  
335 artery and aorta sections persisted ( $p < 0.001$ ), suggesting that additional  
336 morphological factors, besides those investigated here, contribute to the  
337 differences in load that these vessels can endure.

338 Compliance curves calculated from load/strain curves corroborated the  
339 relative elasticity of the aortic sections (  
340  
341 Figure 3F). While both aorta and pulmonary artery walls demonstrated a strong  
342 initial relative volume change, these were smaller for the pulmonary arteries (  
343  
344 Figure 3F). Surprisingly, as demonstrated by plotting systolic pressures with the  
345 compliance curves, all vessels appeared to operate within the shallow portion of  
346 the curve (  
347  
348 Figure 3F), affording them less flexibility in coping with increased blood  
349 pressure. Despite these differences in compliance, the elastic moduli, which  
350 quantify the resistance of a vessel wall to deformation, were similar for all tested  
351 vessel segments over a broad range of pressures (  
352  
353 Figure 3G), although MAP-normalization of pressure indicated that at higher  
354 values the elastic moduli of the pulmonary arteries deviate from those of the  
355 aortas. Altogether, mechanical tensile testing of aortic and pulmonary artery  
356 segments indicated that the pulmonary artery walls were weaker and less  
357 distensible than the aortic walls, which may relate to structural features other  
358 than those investigated here.

359

### 360 **Intraventricular pressure separation polarizes aorta and pulmonary artery** 361 **vessel wall behaviors in response to intramural blood pressures**

362 Our data indicate that, despite the lack of intraventricular pressure separation,  
363 *A. madagascariensis* pulmonary artery and aorta walls are morphologically  
364 different, and this is reflected in the mechanical properties of these vessels. To  
365 better understand the role of intraventricular pressure separation in defining  
366 aorta and pulmonary artery mechanical characteristics, we assessed  
367 comparative vessel mechanical function in context of cardiovascular physiology  
368 of species with (*P. regius*; van Soldt et al., 2015) and without (*A.*  
369 *madagascariensis*) intraventricular pressure separation. We calculated vessel  
370 stiffness and strain at increasing intramural blood pressures of 2, 5 and 10kPa (  
371  
372 Figure 5), coinciding with systemic and pulmonary systolic pressures of *A.*  
373 *madagascariensis* (both 5kPa) and *P. regius* (10kPa and 2.7kPa respectively;

374 Figure 1B). Vessel strain captures deformation, while vessel stiffness describes  
375 resistance against deformation, in a manner where high stiffness correlates with  
376 low strain and vice versa.

377 Our calculations showed that with increasing intramural blood pressure,  
378 stiffness and strain values significantly increased for all vessels regardless of  
379 species (e 5A-B). However, the relative increases in stiffness and strain from 2-  
380 5kPa and 5-10kPa differed between species and between vessels. In *A.*  
381 *madagascariensis* stiffness increased more steeply in aortic segments (from  
382  $\sim 0.025$  to  $\sim 0.06$  and  $\sim 0.235$ ,  $p < 0.0001$ ; e 5A) compared to pulmonary  
383 segments (from  $\sim 0.025$  to  $0.04$  and  $\sim 0.1$ ,  $p = 0.0249$  and  $p < 0.001$ , respectively;  
384 e 5A). Intriguingly, the reverse was true for *P. regius*, where stiffness increased  
385 more steeply in the two pulmonary arteries, though at different rates (on  
386 average from  $\sim 0.025$  to  $\sim 0.15$  and  $\sim 0.3$ ,  $p < 0.0001$ ; e 5A), compared to the  
387 aortas ( $\sim 0.025$  to  $\sim 0.028$  and  $\sim 0.09$ .  $p = 0.0042$  and  $p < 0.001$ , respectively; e 5A).  
388 In regard to strain, *A. madagascariensis* aortas and pulmonary arteries  
389 appeared to operate at significantly different levels of strain but strain increased  
390 similarly in response to pressure increases ( $\sim 2.5$  times from 2kPa to 10kPa,  
391  $p < 0.0001$ ; e 5B). In *P. regius*, however, the pulmonary arteries operate at  
392 higher strains than the aortas at 2kPa ( $p < 0.001$ ; e 5B) and only display, on  
393 average, a  $\sim 20\%$  increase in strain at 10kPa. In addition, the relative increase in  
394 strain is comparatively steeper from 2-5kPa ( $p < 0.001$ ; e 5B) than from 5-10kPa  
395 ( $p = 0.0079$ ; e 5B). In contrast, the aortas display significant, linear increases in  
396 strain from 2-10kPa ( $p < 0.0001$ ; e 5B). Combined, these data show that in both  
397 species the increase in vessel stiffness is steeper when blood pressure passes  
398 above species-specific systolic pressures, resulting in a polarization of vessel  
399 mechanical behaviors in *P. regius*, where systemic and pulmonary blood  
400 pressures are significantly different.

401 We hypothesized that the observed inter-species differences were  
402 associated with differences in vessel morphologies. We therefore compared  
403 morphological parameters (cross-sectional area, diameter and unit collagen) of  
404 vessel walls between these species (

405  
406 Figure 5C-E). Intriguingly, while wall cross-sectional area did not differ (

407

408 Figure 5C), *A. madagascariensis* had significantly narrower pulmonary  
409 arteries ( $p < 0.0001$ ;

410

411 Figure 5D) with a higher unit collagen ( $p < 0.01$ ;

412

413 Figure 5E) than *P. regius*.

414 Thus, *A. madagascariensis* pulmonary arteries are significantly narrower

415 and weaker than aortas, but nevertheless respond similarly to increases in

416 blood pressure. This stands in contrast to *P. regius*, where aortas and

417 pulmonary arteries respond differently to increases in blood pressure.

418

## 419 Discussion

420 Thoma was first to propose that blood circulation impacts blood vessel

421 morphogenesis, describing relationships between blood flow and vessel radius,

422 as well as blood pressure and wall cross-sectional area (Thoma, 1893;

423 Wagenseil and Mecham, 2009). Indeed, the wall of the mammalian aorta is

424 thick and strong in comparison to the pulmonary artery, and these differences

425 are associated with high systemic and low pulmonary blood pressures as a

426 result of intraventricular pressure separation postnatally (Gerrity and Cliff, 1975;

427 Leung et al., 1977). We here showed measurements from *Acrantophis*

428 *madagascariensis* that demonstrate that morphological and mechanical

429 characteristics of aorta and pulmonary artery can diverge even in absence of

430 intraventricular pressure separation, corroborated by data from *E. notaeus*

431 (Filogonio et al., 2018).

432 The absence of intraventricular pressure separation in *A.*

433 *madagascariensis* is obvious when considering data from *Python molurus*

434 (Figure 1B; Wang et al., 2003). Here, systemic systolic pressure ( $10.01 \pm 1.13$

435 kPa) is higher than pulmonary systolic pressure ( $2.67 \pm 0.51$  kPa). Importantly, *P.*

436 *molurus* systemic systolic pressure was higher ( $p = 0.032$ ) and pulmonary

437 systolic pressure lower ( $p = 0.049$ ) than in *A. madagascariensis*.

438 Despite differences in morphology and mechanical characteristics

439 between *A. madagascariensis* aorta and pulmonary artery walls, these vessels

440 nevertheless responded similarly to increasing wall tension within physiological

441 blood pressure ranges. In contrast, *P. regius* aorta and pulmonary artery

442 responded differently, consistent with the intraventricular pressure separation in

443 this species that polarizes systemic and pulmonary blood pressures. For  
444 example, the stiffness of all *A. madagascariensis* vessels increased more  
445 steeply from 5-10kPa than 2-5kPa, in line with a blood pressure of 5kPa (  
446  
447 Figure 5A,B). In contrast, the *P. regius* pulmonary artery stiffness increased  
448 dramatically at pressures over 2kPa, reflecting the systolic pulmonary blood  
449 pressure of 2.7kPa. This aligns with stiffness/strain calculations in human and  
450 pig, where the pulmonary artery was also stiffer than the aorta at systemic blood  
451 pressures (Azadani et al., 2012; Matthews et al., 2010). Thus, the aorta and  
452 pulmonary artery are each optimized to handle respective physiological blood  
453 pressures, regardless of whether these are equal or divergent.

454 We were initially surprised that *A. madagascariensis* pulmonary arteries  
455 withstood the same blood pressures as the aorta, given their lower strength.  
456 However, the law of Laplace intuitively explains that narrow pulmonary arteries  
457 do not require strong, thick walls (high cross-sectional area) (Burton, 1965;  
458 Shadwick, 1999; Valentinuzzi and Kohen, 2011). Indeed, the pulmonary arteries  
459 of *A. madagascariensis* and *E. notaeus* were narrower than in *P. regius*, but  
460 with similar cross-sectional areas (  
461

462 Figure 5C-D). Thus, the reduction of pulmonary artery radius may be a  
463 mechanism to withstand high pulmonary blood pressure in species that lack  
464 intraventricular pressure separation.

465 While theoretically compelling, the narrow pulmonary arteries of *A.*  
466 *madagascariensis* and *E. notaeus* were surprising, since narrow vessels  
467 implicate low blood volume. Studies in sheep demonstrated that abdominal  
468 blood flow and vessel diameter decreased concurrently postnatally (Bendeck  
469 and Langille, 1992; Bendeck et al., 1994; Langille, 1996; Langille et al., 1990).  
470 In rabbit, aorta and pulmonary artery diameters remain similar postnatally while  
471 aorta wall thickness increases, likely to accommodate increasing aortic blood  
472 pressure (Leung et al., 1977). Likewise, in *P. regius* we previously found that  
473 aorta and pulmonary artery diameters were similar, but the aortic wall was  
474 thicker (van Soldt et al., 2015). Thus, one possible explanation for the narrow  
475 pulmonary arteries in *A. madagascariensis* and *E. notaeus* includes the  
476 capacity for right-to-left cardiac shunts, whereby systemic blood bypasses the  
477 lungs for systemic recirculation, decreasing pulmonary blood flow (Hicks, 1998).  
478 *P. regius* has limited capacity for such shunts (Jensen and Wang, 2009; Jensen

479 et al., 2010b; Wang et al., 2003), and in mammals such shunts are impossible  
480 due to physical separation of systemic and pulmonary circuits (Hicks, 1998).  
481 Thus, these animals may require a wider pulmonary artery to accommodate the  
482 volume of blood flowing through these vessels, instead gaining a thicker aortic  
483 vessel wall to accommodate the higher systemic blood pressure. Indeed, In the  
484 American alligator, *Alligator mississippiensis*, a species with complete ventricular  
485 separation but with an ability to promote right-to-left shunts through the foramen  
486 of Panizza, the left pulmonary artery is narrower than the right aorta,  
487 corroborating the hypothesis (Filogonio et al., 2021). However, further study is  
488 required to ascertain the level of intracardiac shunting in *A. madagascariensis*  
489 and *E. notaeus*.

490 We showed that pulmonary artery unit collagen was markedly higher in  
491 *A. madagascariensis* and *E. notaeus* compared to *P. regius*. Blood vessel wall  
492 structure is fundamentally similar across species, but collagen and elastin  
493 content are known to differ to change vessel mechanical properties (Shadwick,  
494 1998; Shadwick, 1999). Wall strength is primarily mediated by collagen,  
495 suggesting that high unit collagen may complement reduced vessel diameter to  
496 strengthen the pulmonary arteries (Dobrin, 1978; Sage and Gray, 1979).  
497 Structural features of collagen that were not analyzed here, such as cross-  
498 linking and fiber alignment, could further contribute to a role for collagen in  
499 strengthening pulmonary artery walls. Other components of the extracellular  
500 matrix, such as glycosaminoglycans, may also be determinant in defining  
501 several morphological and mechanical characteristics of the arterial wall  
502 (Gandley et al., 1997).

503 Given that intraventricular pressure separation alone may not define  
504 gross morphological characteristics of the aorta and pulmonary artery, we  
505 suggest that ontogenetic factors may also contribute. Importantly, the aorta and  
506 pulmonary arteries derive from different cellular progenitor populations  
507 (DeSesso, 2017; Herriges and Morrissey, 2014; Peng and Morrissey, 2013; Peng  
508 et al., 2013). Thus, this divergent ontogeny may lay the foundation for diverging  
509 transcriptional programs that are ultimately expressed in the different  
510 morphology of the pulmonary artery as compared to the aorta.



511 In conclusion, we showed that the absence of intraventricular pressure  
512 separation in *A. madagascariensis* does not equalize the morphologies and  
513 mechanical characteristics of its aorta and pulmonary artery. We propose that,  
514 to mitigate a higher wall tension as a consequence of increased pulmonary  
515 blood pressure, the pulmonary artery became narrower and the collagen  
516 content of its wall increased. However, this may only be possible in species with  
517 a capacity for right-to-left cardiac shunts as a mechanism to decrease  
518 pulmonary blood flow. Finally, we suggest that ontogenetic differences may be  
519 fundamental to the morphological differences between these arteries. Thus, in  
520 evolution, compensatory mechanisms to accommodate a range of intramural  
521 blood pressures may have followed the law of Laplace in different and  
522 sometimes unexpected ways.

523

## 524 **Acknowledgements**

525 The authors declare no conflict of interest. We thank Mrs. Jytte Utoft for cutting  
526 the vessel sections for histology, Mrs. E. K. Mikkelsen for her help in the elastin  
527 and hydroxyproline determinations, and Dr. H. G. J. van Mil for his expert help  
528 with the statistics. We also thank Dr. C. Williams for measuring blood pressures  
529 in anesthetized *A. madagascariensis* specimens. The authors were supported  
530 by the Danish Council for Independent Research (Det Frie Forskningsråd|Natur  
531 og Univers), the Leiden University Fund (LUF), the Royal Dutch Zoological  
532 Society (KNDV), the Outbound Study Grant (OSG) as well as the Erasmus  
533 student exchange program.

534

535 **References**

- 536 **Adham, M., Gournier, J. P., Favre, J. P., De La Roche, E., Ducerf, C.,**  
537 **Baulieux, J., Barral, X. and Pouyet, M.** (1996). Mechanical characteristics  
538 of fresh and frozen human descending thoracic aorta. *J. Surg. Res.* **64**, 32–  
539 4.
- 540 **Azadani, A. N., Chitsaz, S., Matthews, P. B., Jaussaud, N., Leung, J.,**  
541 **Wisneski, A., Ge, L. and Tseng, E. E.** (2012). Biomechanical comparison  
542 of human pulmonary and aortic roots. *Eur. J. Cardio-Thoracic Surg.* **41**,  
543 1111–1116.
- 544 **Baker, R. W. R. and Nissim, J. A.** (1963). Expressions for Combining Standard  
545 Errors of Two Groups and for Sequential Standard Error. *Nature* **198**, 1020.
- 546 **Bates, D., Maechler, M., Bolker, B. and Walker, S.** (2014). lme4: Linear  
547 mixed-effects models using Eigen and S4.
- 548 **Bendeck, M. P. and Langille, B. L.** (1992). Changes in blood flow distribution  
549 during the perinatal period in fetal sheep and lambs. *Can. J. Physiol.*  
550 *Pharmacol.* **70**, 1576–1582.
- 551 **Bendeck, M. P., Keeley, F. W. and Langille, B. L.** (1994). Perinatal  
552 accumulation of arterial wall constituents: relation to hemodynamic  
553 changes at birth. *Am. J. Physiol. Circ. Physiol.* **267**, H2268–H2279.
- 554 **Burton, A. C.** (1965). *Physiology and Biophysics of the Circulation*. Chicago:  
555 Year Book Medical Publishers.
- 556 **Chow, M.-J. and Zhang, Y.** (2011). Changes in the mechanical and  
557 biochemical properties of aortic tissue due to cold storage. *J. Surg. Res.*  
558 **171**, 434–42.
- 559 **Danielsen, C. C. and Andreassen, T. T.** (1988). Mechanical properties of rat  
560 tail tendon in relation to proximal-distal sampling position and age. *J.*  
561 *Biomech.* **21**, 207–12.
- 562 **DeSesso, J. M.** (2017). Vascular ontogeny within selected thoracoabdominal  
563 organs and the limbs. *Reprod. Toxicol.* **70**, 3–20.

- 564 **Dobrin, P. B.** (1978). Mechanical properties of arteries. *Physiol. Rev.* **58**, 397–  
565 460.
- 566 **Filogonio, R., Wang, T. and Danielsen, C. C.** (2018). Analysis of vascular  
567 mechanical properties of the yellow anaconda reveals increased elasticity  
568 and distensibility of the pulmonary artery during digestion. *J. Exp. Biol.*  
569 **221**,.
- 570 **Filogonio, R., Dubansky, B. D., Dubansky, B. H., Wang, T., Eelsey, R. M.,**  
571 **Leite, C. A. C. and Crossley, D. A.** (2021). Arterial wall thickening  
572 normalizes arterial wall tension with growth in American alligators, Alligator  
573 mississippiensis. *J. Comp. Physiol. B Biochem. Syst. Environ. Physiol.* **191**,  
574 553–562.
- 575 **Fox, J. and Weisberg, S.** (2011). *An {R} Companion to Applied Regression*.  
576 SAGE Publications.
- 577 **Gandley, R. E., McLaughlin, M. K., Koob, T. J., Little, S. A. and McGuffee,**  
578 **L. J.** (1997). Contribution of chondroitin dermatan sulfate-containing  
579 proteoglycans to the function of rat mesenteric arteries. *Am. J. Physiol. -*  
580 *Hear. Circ. Physiol.* **273**,.
- 581 **Gerrity, R. G. and Cliff, W. J.** (1975). The aortic tunica media of the developing  
582 rat. I. Quantitative stereologic and biochemical analysis. *Lab. Invest.* **32**,  
583 585–600.
- 584 **Gibbons, C. A. and Shadwick, R. E.** (1989). Functional similarities in the  
585 mechanical design of the aorta in lower vertebrates and mammals.  
586 *Experientia* **45**, 1083–1088.
- 587 **Herman, I. P.** (2007). Basic physics of pressure and flow of fluids. In *Physics of*  
588 *the human body*, pp. 408–411. New York, NY: Springer.
- 589 **Herriges, M. and Morrissey, E. E.** (2014). Lung development: orchestrating the  
590 generation and regeneration of a complex organ. *Development* **141**, 502–  
591 13.
- 592 **Hicks, J. W.** (1998). Cardiac Shunting in Reptiles. Mechanisms, Regulation and  
593 Physiological Functions. In *Biology of the Reptilia Vol. 19 (Morphology G)*

- 594 (ed. Gans, C.) and Gaunt, A. S.), pp. 425–483. Ithaca, New York: SSAR  
595 Press.
- 596 **Hothorn, T., Bretz, F. and Westfall, P.** (2008). Simultaneous Inference in  
597 General Parametric Models. *Biometrical J.* **50**, 346–363.
- 598 **Jensen, B. and Wang, T.** (2009). Hemodynamic Consequences of Cardiac  
599 Malformations in Two Juvenile Ball Pythons (*Python regius*). *J. Zoo Wildl.*  
600 *Med.* **40**, 752–756.
- 601 **Jensen, B., Nielsen, J., Axelsson, M., Pedersen, M., Löfman, C. and Wang,**  
602 **T.** (2010a). How the python heart separates pulmonary and systemic blood  
603 pressures and blood flows. *J. Exp. Biol.* **213**, 1611–1617.
- 604 **Jensen, B., Nyengaard, J. R., Pedersen, M. and Wang, T.** (2010b). Anatomy  
605 of the python heart. *Anat. Sci. Int.* **85**, 194–203.
- 606 **Jensen, B., Moorman, A. F. M. and Wang, T.** (2014). Structure and function of  
607 the hearts of lizards and snakes. *Biol. Rev.* **89**, 302–336.
- 608 **Jones, E. A. V., Le Noble, F. and Eichmann, A.** (2006). What determines  
609 blood vessel structure? Genetic prespecification vs. hemodynamics.  
610 *Physiology* **21**, 388–395.
- 611 **Langille, B. L.** (1996). Arterial remodeling: relation to hemodynamics. *Can. J.*  
612 *Physiol. Pharmacol.* **74**, 834–841.
- 613 **Langille, B. L., Brownlee, R. D. and Adamson, S. L.** (1990). Perinatal aortic  
614 growth in lambs: Relation to blood flow changes at birth. *Am. J. Physiol. -*  
615 *Hear. Circ. Physiol.* **259**,.
- 616 **Lansing, A. I., Rosenthal, T. B., Alex, M. and Dempsey, E. W.** (1952). The  
617 structure and chemical characterization of elastic fibers as revealed by  
618 elastase and by electron microscopy. *Anat. Rec.* **115**, 555–575.
- 619 **Leung, D. Y., Glagov, S. and Mathews, M. B.** (1977). Elastin and collagen  
620 accumulation in rabbit ascending aorta and pulmonary trunk during  
621 postnatal growth. Correlation of cellular synthetic response with medial  
622 tension. *Circ. Res.* **41**, 316–323.
- 623 **Matthews, P. B., Azadani, A. N., Jhun, C. S., Ge, L., Guy, T. S., Guccione, J.**

- 624 **M. and Tseng, E. E.** (2010). Comparison of Porcine Pulmonary and Aortic  
625 Root Material Properties. *Ann. Thorac. Surg.* **89**, 1981–1988.
- 626 **Neuman, R. E. and Logan, M. A.** (1950). The determination of collagen and  
627 elastin in tissues. *J. Biol. Chem.* **186**, 549–556.
- 628 **Peng, T. and Morrissey, E. E.** (2013). Development of the pulmonary  
629 vasculature: Current understanding and concepts for the future. *Pulm. Circ.*  
630 **3**, 176–178.
- 631 **Peng, T., Tian, Y., Boogerd, C. J., Lu, M. M., Kadzik, R. S., Stewart, K. M.,**  
632 **Evans, S. M. and Morrissey, E. E.** (2013). Coordination of heart and lung  
633 co-development by a multipotent cardiopulmonary progenitor. *Nature* **500**,  
634 589–592.
- 635 **R Core Team** (2014). R: A Language and Environment for Statistical  
636 Computing.
- 637 **Reneman, R. S., Arts, T. and Hoeks, A. P. G.** (2006). Wall shear stress - an  
638 important determinant of endothelial cell function and structure - in the  
639 arterial system in vivo. *J. Vasc. Res.* **43**, 251–69.
- 640 **RStudio** (2013). RStudio: Integrated development environment for R.
- 641 **Sage, H. and Gray, W. R.** (1979). Studies on the evolution of elastin - I  
642 Phylogenetic distribution. *Comp. Biochem. Physiol. Part B Biochem. Mol.*  
643 *Biol.* **64B**, 313–327.
- 644 **Sarkar, D.** (2008). *Lattice: Multivariate Data Visualization with R*. New York:  
645 Springer.
- 646 **Shadwick, R. E.** (1998). Elasticity in Arteries: A similar combination and stiff  
647 materials creates common mechanical of rubbery and some invertebrates  
648 properties in blood vessels of vertebrates. *Am. Sci.* **86**, 535–541.
- 649 **Shadwick, R. E.** (1999). Mechanical design in arteries. *J. Exp. Biol.* **202**, 3305–  
650 13.
- 651 **Stemper, B. D., Yoganandan, N., Stineman, M. R., Gennarelli, T. a, Baisden,**  
652 **J. L. and Pintar, F. a** (2007). Mechanics of fresh, refrigerated, and frozen  
653 arterial tissue. *J. Surg. Res.* **139**, 236–42.

- 654 **Thoma, R.** (1893). *Untersuchungen über die Histogenese und*  
655 *Histomechanikdes Gefässsystems*. Stuttgart: Ferdinand Enke.
- 656 **Valentinuzzi, M. and Kohen, A.** (2011). Laplace's Law: What It Is About,  
657 Where It Comes from, and How It Is Often Applied in Physiology. *Pulse,*  
658 *IEEE* 74–84.
- 659 **van Soldt, B. J., Danielsen, C. C. and Wang, T.** (2015). The mechanical  
660 properties of the systemic and pulmonary arteries of python regius  
661 correlate with blood pressures. *J. Morphol.* **276**, 1412–1421.
- 662 **Wagenseil, J. E. and Mecham, R. P.** (2009). Vascular extracellular matrix and  
663 arterial mechanics. *Physiol. Rev.* **89**, 957–989.
- 664 **Wagenseil, J. E., Ciliberto, C. H., Knutsen, R. H., Levy, M. A., Kovacs, A.**  
665 **and Mecham, R. P.** (2009). Reduced vessel elasticity alters cardiovascular  
666 structure and function in newborn mice. *Circ. Res.* **104**, 1217–1224.
- 667 **Wang, T., Altimiras, J. and Axelsson, M.** (2002). Intracardiac flow separation  
668 in an in situ perfused heart from Burmese python *Python molurus*. *J. Exp.*  
669 *Biol.* **205**, 2715–23.
- 670 **Wang, T., Altimiras, J., Klein, W. and Axelsson, M.** (2003). Ventricular  
671 haemodynamics in *Python molurus*: separation of pulmonary and systemic  
672 pressures. *J. Exp. Biol.* **206**, 4241–4245.
- 673 **Woessner, J. F.** (1976). Determination of hydroxyproline in connective tissues.  
674 In *The methodology of connective tissue research* (ed. Hall, D. A.), pp.  
675 227–233. Oxfors: Joynson-Bruvvers Ltd.
- 676 **Zaar, M., Overgaard, J., Gesser, H. and Wang, T.** (2007). Contractile  
677 properties of the functionally divided python heart: two sides of the same  
678 matter. *Comp. Biochem. Physiol. A. Mol. Integr. Physiol.* **146**, 163–73.  
679

680 **Figures**

681 **Figure 1: Systemic and pulmonary blood pressures in *A.***  
682 ***madagascariensis* and *Python molurus*.** (A) Waveforms showing *A.*  
683 *madagascariensis* left and right intraventricular blood pressures, as well as right  
684 aorta (through vertebral artery) and right pulmonary artery blood pressures and  
685 (B) bar plots comparing systemic and pulmonary systolic, mean arterial and  
686 diastolic pressures in *P. molurus* (PM) and *A. madagascariensis* (AM). Error  
687 bars in (B) indicate SEM. *P. molurus* data is from Wang et al. (2003). Note that  
688 *A. madagascariensis* was anesthetized using pentobarbital, and *P. molurus*  
689 using halothane.

690

691 **Figure 2: Examinations and quantifications of key histological parameters**  
692 **of *A. madagascariensis* aorta and pulmonary arteries.** (A-L) Brightfield (A-B,  
693 D-E, G-H, J-K) and circular polarization (C,F,I,L) images of proximal sections of  
694 left (PLAo; A-C) and right aorta (PRAo; D-F), and left (LPA; G-I) and right  
695 pulmonary artery (RPA; J-L). The aortas are wider and thicker-walled than the  
696 pulmonary arteries. (M-O) Bar plots depicting vessel wall cross-sectional area  
697 (M), unstrained diameter (N) and collagen content normalized by vessel  
698 diameter (unit collagen, UC; O). “R” and “L” denote significant difference  
699 between respective vessel section and right or left pulmonary artery. Ad: tunica  
700 adventitia; Me: tunica media. Barplots display mean±SEM.

701

702 **Figure 3: The pulmonary artery walls are weaker and less distensible than**  
703 **the aortic walls.** (A) Representative aortic and pulmonary artery loop curves  
704 derived from 5-cycle uniaxial mechanical tension testing. Cycles one through  
705 four are grey, fifth cycle is bolded black (proximal segment of left aorta) or red  
706 (left pulmonary artery). Up and down arrows denote loading and de-loading  
707 segments of the cycle graphs, respectively. Area within loading/unloading  
708 curves is termed ‘loop area’ ( $A_{loop}$ ). (B) Barplot showing hysteresis (viscous

709 damping), calculated from fifth tension test cycle (A, bolded lines) by dividing  
710 loop area ( $A_{loop}$ , A) by the area under the loading curve. Load/strain curves (C),  
711 stress/strain curves (D) and barplot showing maximum load (filled bars) and  
712 strain (empty bars) (E), as well as compliance (F) and elastic modulus/pressure  
713 curves (G) derived from uniaxial mechanical tension testing to rupture.  
714 Load/strain and stress/strain curves (C) are connected by dotted lines to  
715 maximum load/strain and stress/strain values (symbols in C, D). Compliance  
716 curves include indications of systolic pulmonary and aortic blood pressures (red  
717 and black dashed lines, respectively). The elastic modulus was calculated from  
718 differentiated load/strain data divided by vessel wall cross-sectional area and  
719 plotted against pressure change (E) or pressure change normalized for mean  
720 arterial blood pressure values (E inset; 4.94kPA aortic MAP; 3.49kPA  
721 pulmonary MAP). Left and right aorta curves represent pooled data from  
722 respective proximal and distal segments. “R” and “L” denote significant  
723 difference between respective vessel section and right or left pulmonary artery.  
724 Barplots display mean $\pm$ SEM.

725

726 **Figure 4: The pulmonary arteries are structurally weaker than the aortas.**

727 Barplots depict normalized values of maximum load ( $F_{max}$ ) for cross-sectional  
728 area (maximum stress,  $\sigma_{max}$ ) (A) and unit collagen (B). “R” and “L” denote  
729 significant difference between respective vessel section and right or left  
730 pulmonary artery. Barplots denote mean $\pm$ SEM.

731

732 **Figure 5: Species comparisons of functional and morphological variables**  
733 **demonstrate consistent morphological and operational differences**  
734 **between species with and without intraventricular pressure separation. (A-**

735 B) Line plots showing change in stiffness (A) and strain (B) of aortic and  
736 pulmonary vessels at increasing blood pressures in *A. madagascariensis* (left  
737 panels) and *P. regius* (right panels). (C-E) Barplots showing species  
738 comparisons of dorsal aorta (DAo) and right pulmonary artery (RPA) cross-



739 sectional area (C), diameter (D) and unit collagen (E) normalized for  
740 corresponding values of dorsal aorta between *A. madagascariensis* (red bars,  
741 this study), *E. notaeus* (green bars, Filogonio et al., 2018) and *P. regius* (blue  
742 bars, van Soldt et al., 2015). “R” and “L” denote significant difference between  
743 right or left pulmonary artery and the aortic vessel sections at the corresponding  
744 intramural blood pressure, while red and black horizontal bars and p-values  
745 correspond to significant differences of stiffness and strain values between the  
746 respective intramural blood pressures (A-B). N/S denotes ‘not significant’. Data  
747 displayed as mean±SEM.

748 **Tables**

| <b>Species</b>                          | <b>n</b> | <b>Weight<br/>(g)</b> | <b>Used for</b>                                                                                                                                                     |
|-----------------------------------------|----------|-----------------------|---------------------------------------------------------------------------------------------------------------------------------------------------------------------|
| <i>Acrantophis<br/>madagascariensis</i> | 2        | 499-655               | Blood pressure<br>measurements under<br>anesthesia; mechanical<br>testing; determinations<br>of % of dry weight<br>elastin and collagen<br>determination            |
| <i>Acrantophis<br/>madagascariensis</i> | 4        | 244-308               | Blood pressure<br>measurements while<br>conscious and at rest;<br>mechanical testing;<br>determinations of % of<br>dry weight elastin and<br>collagen determination |
| <i>Acrantophis<br/>madagascariensis</i> | 3        | 267 – 299             | Mechanical testing;<br>determinations of % of<br>dry weight elastin and<br>collagen determination                                                                   |

749 **Table 1: Specimens used in this study.**

|                     | Systemic (kPA) |           |               | Pulmonary (kPA) |           |               |
|---------------------|----------------|-----------|---------------|-----------------|-----------|---------------|
|                     | Systolic       | Diastolic | MAP           | Systolic        | Diastolic | MAP           |
| AM;<br>anesthetized | 4.94±0.5<br>5  | 3.49±0.56 | 3.97±<br>0.55 | 4.66±0.18       | 1.91±0.34 | 2.82±<br>0.74 |
| AM;<br>conscious    | 4.9±0.2        | 3.48±0.18 | 3.95±<br>0.17 | N/A             | N/A       | N/A           |
| PM;<br>anesthetized | 10±1.13        | 7.98±0.94 | 8.94±<br>1.04 | 2.67±0.51       | 1.93±0.46 | 2.26±<br>0.48 |
| PM;<br>conscious    | 8.59±0.4       | 6.2±0.45  | 7.42±<br>0.41 | 1.43±0.13       | 0.8±0.08  | 1.14±<br>0.11 |

750 **Table 2: Pressure measurements for anesthetized and conscious earth**

751 **boa (AM) and ball Python (PM).** Measurements given as mean±SEM.

| <b>Vessel segment</b> | <b>n</b> | <b>Pooled samples</b> | <b>Elastin content (% of dry weight)</b> | <b>Collagen content (% of dry weight)</b> |
|-----------------------|----------|-----------------------|------------------------------------------|-------------------------------------------|
| PLAo                  | 2        | 1-4, 5-9              | 30.5±0.1                                 | 21.7±2.2                                  |
| DLAo                  | 2        | 1-5, 6-9              | 32.5±0.3                                 | 19.9±0.1                                  |
| PRAo                  | 2        | 1-4, 5-9              | 28.5±0.3                                 | 21.7±0.5                                  |
| DRAo                  | 2        | 1-4, 5-9              | 26.9±0.8                                 | 21.5±1.7                                  |
| DAo                   | 2        | 1-4, 5-9              | 31.0±0.0                                 | 17.4±0.9                                  |
| LPA                   | 1        | 1-9                   | 8.9                                      | 39.4                                      |
| RPA                   | 1        | 1-9                   | 11.1                                     | 41.5                                      |

752 **Table 3: Vessel ring wall composition.** Samples from snakes were pooled  
753 (column 3) to return measurements per vessel section. Four determinations  
754 were performed per measurement (column 2). Elastin and collagen content as a  
755 percentage of dry weight is given as mean±SEM, when applicable.

# A Systemic and pulmonary blood pressures

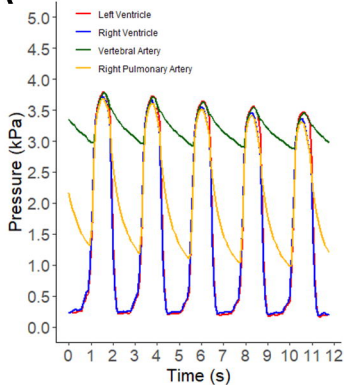

# B Comparative blood pressure

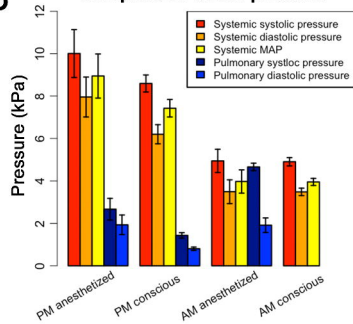

Figure 1

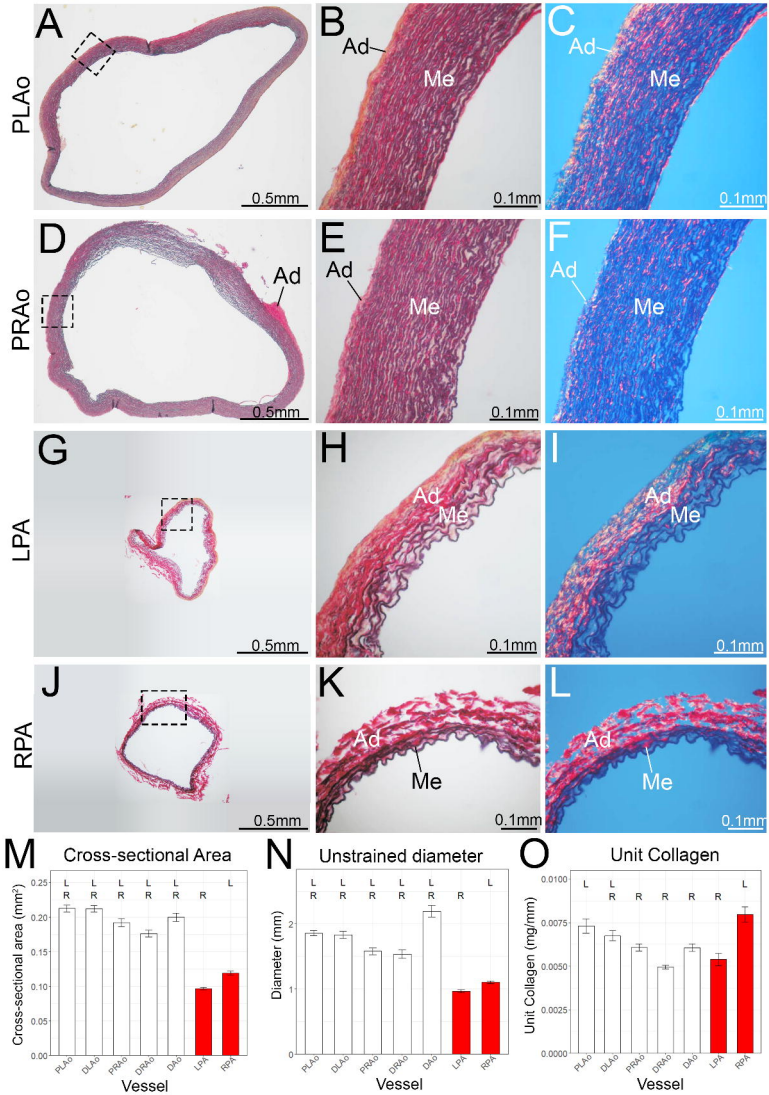

**Figure 2**

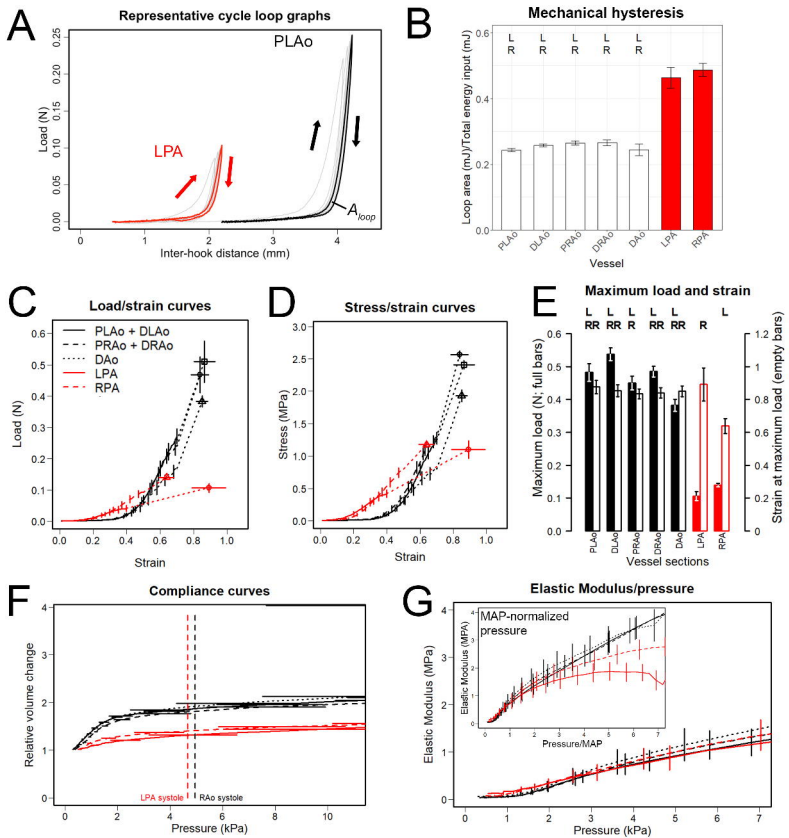

Figure 3

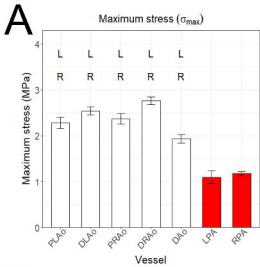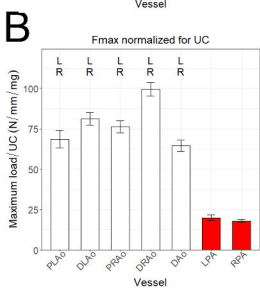

Figure 4



### Stiffness at increasing intramural blood pressures

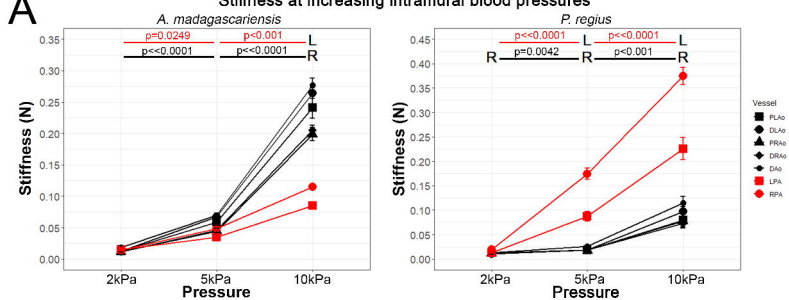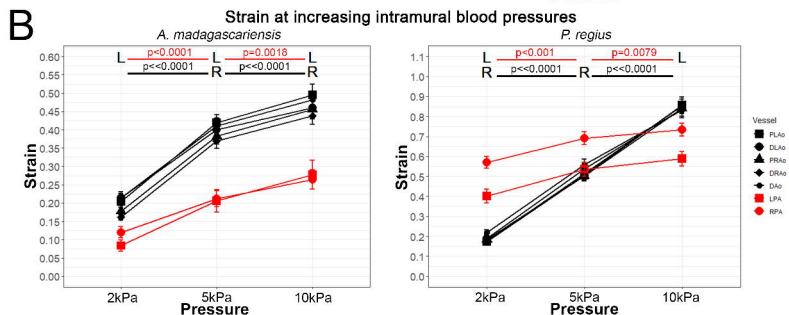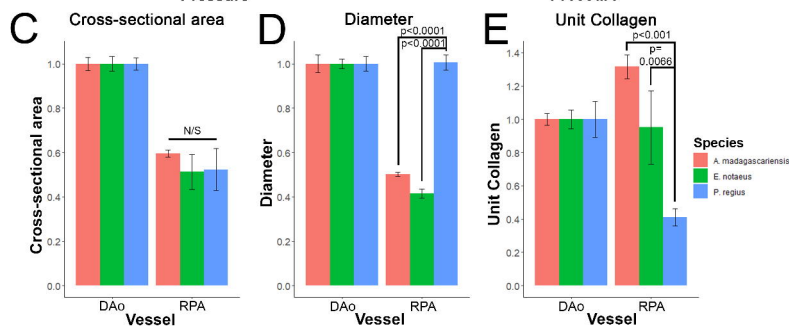

Figure 5
